# Supplementary material for: pH-responsive biocompatible fluorescent polymer nanoparticles based on phenylboronic acid for intracellular imaging and drug delivery
Source: Royal Society of Chemistry journal article supplement (doi:10.1039/c4nr04054f), 2014-09-11
Supplement: c4nr04054f1.pdf [file c4nr04054f1.pdf]

## Supplementary Information

# **pH-Responsive Biocompatible Luminescent Polymer Nanoparticles Based Phenylboronic Acid for Intracellular Imaging and Drug Delivery**

Shengliang Li<sup>1,2,\*</sup>, Kelei Hu<sup>1,3,\*</sup>, Weipeng Cao<sup>1</sup>, Yun Sun<sup>1</sup>, Wang Sheng<sup>3</sup>, Feng Li<sup>2</sup>,

Yan Wu<sup>1,#</sup>, Xing-Jie Liang<sup>1,#</sup>

<sup>1</sup>Chinese Academy of Sciences Key Lab for Biological Effects of Nanomaterials and Nanosafety, National Center for Nanoscience and Technology  
No.11, First North Road, Zhongguancun, 100190 Beijing, P.R. China

<sup>2</sup>Department of Neurobiology and Anatomy, Zhongshan School of Medicine, Sun Yat-sen University, Guangzhou, China

<sup>3</sup>College of Life Science and Bioengineering Beijing University of Technology  
No.100 Pingleyuan, Chaoyang District, Beijing 100124, P.R.China

\*These authors contributed equally to this work.

#To whom correspondence should be addressed.

Correspondence and requests for materials should be addressed to Y. W. and X. J. L. (email:

liangxj@nanoctr.cn; wuy@nanoctr.cn)

## Figures and Tables

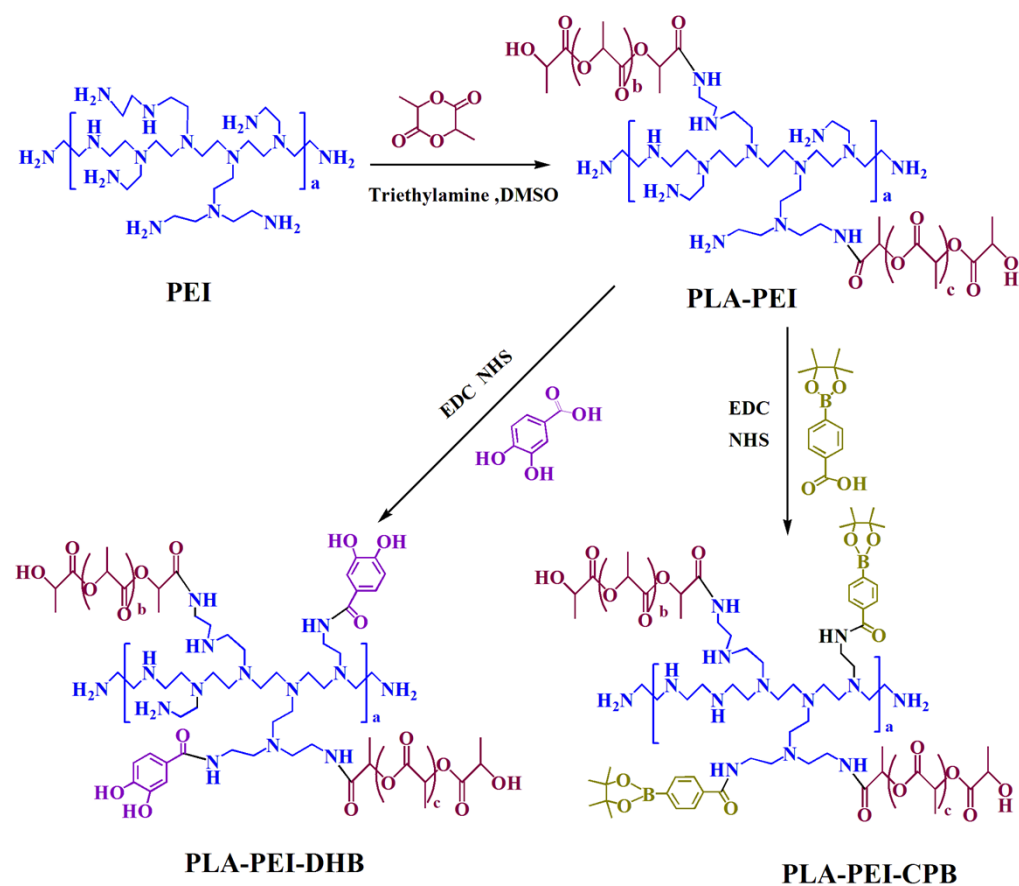

**Figure S1** Scheme showing the synthesis of the PLA-PEI copolymer and its functionalization with DHB and CPB.

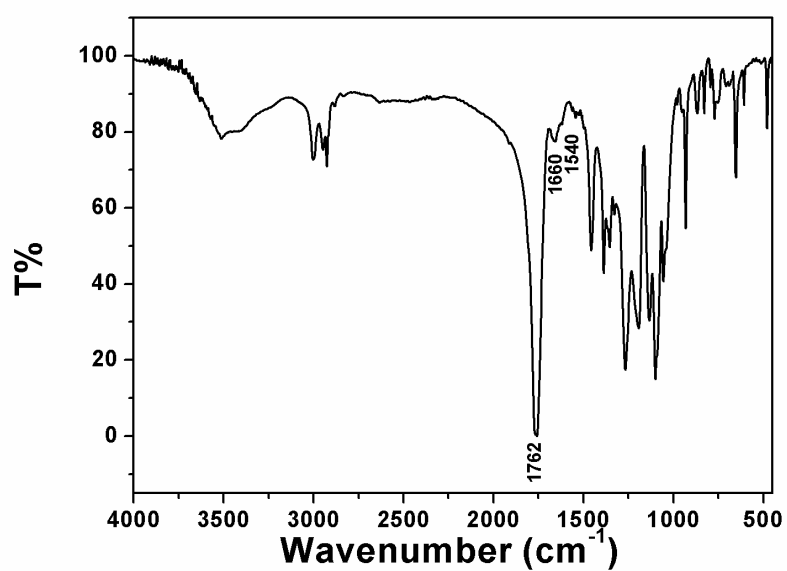

**Figure S2** The FT-IR spectra of PLA-PEI copolymer

Notice that the strong absorption peak at  $\sim 1762\text{ cm}^{-1}$  were attributed to the stretching vibration of the carbonyl group in PLA, and the absorption peaks at  $\sim 1660$  and  $\sim 1540\text{ cm}^{-1}$  were resulted from the amide I and II bands in PLA-PEI.

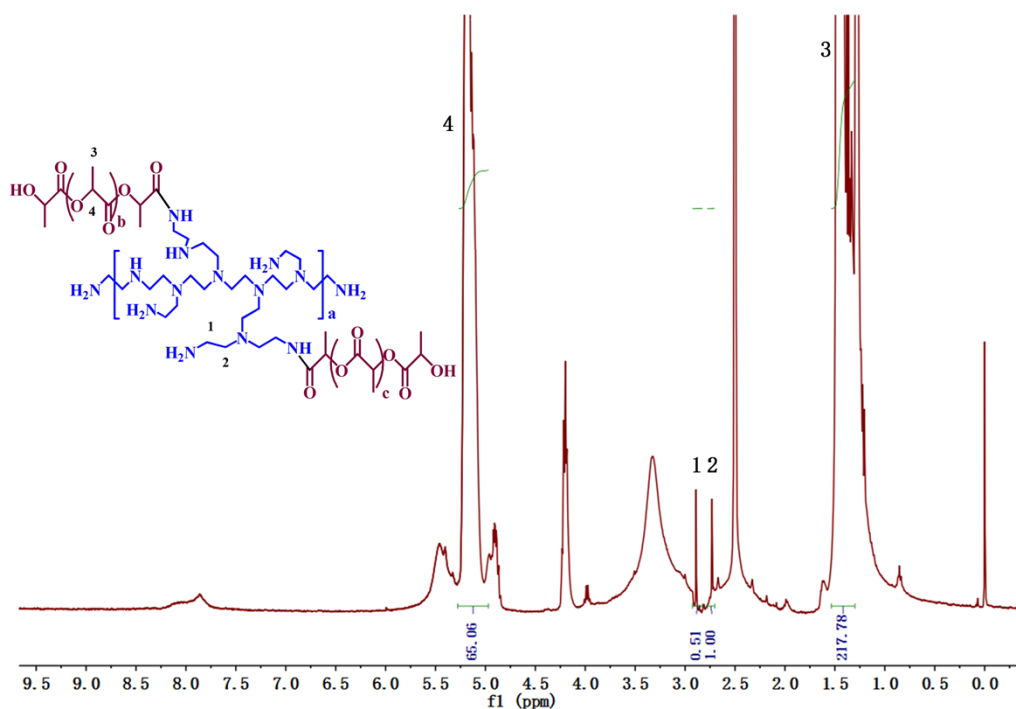

**Figure S3**  $^1\text{H}$  NMR spectra of PLA-PEI copolymer

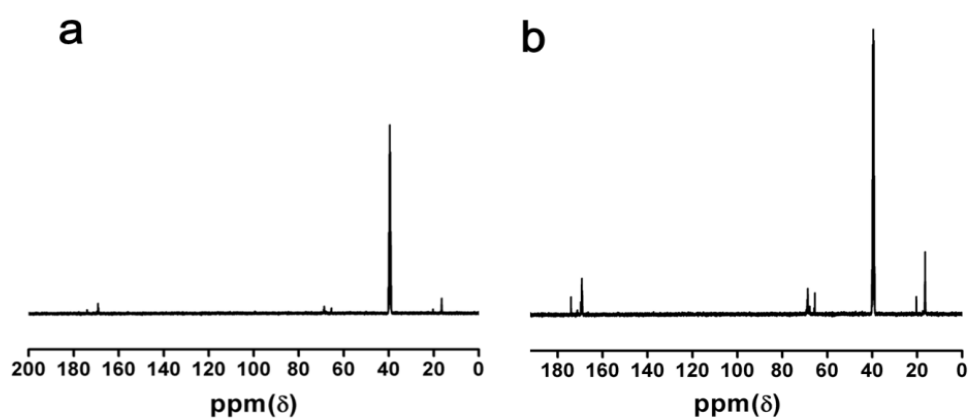

**Figure S4**  $^{13}\text{C}$  NMR spectra of PLA-PEI-CPB (a) and PLA-PEI-DHB (b).

Notice that the signals at 160-180 ppm of the  $^{13}\text{C}$  NMR spectra also confirmed the existence of the aromatic ring moiety of PLA-PEI-DHB and PLA-PEI-CPB.

The molar ratios of the small molecules conjugated to PEI and repeating units in PEI and PLA was determined by the peak intergration ratios of the protons of the aromatic

ring in small molecules, -CH<sub>2</sub>- protons in PEI blocks, and -CH- protons in PLA blocks.

Table S1. Quantum yield using quinoline sulfate as a reference

| Sample            | Abs at 360 nm | Integrated emission intensity | QY          |
|-------------------|---------------|-------------------------------|-------------|
| Quinoline Sulfate | 0.019         | 122315.2538                   | 0.54(Known) |
| FBNPs             | 0.027         | 36563.2408                    | 0.226       |

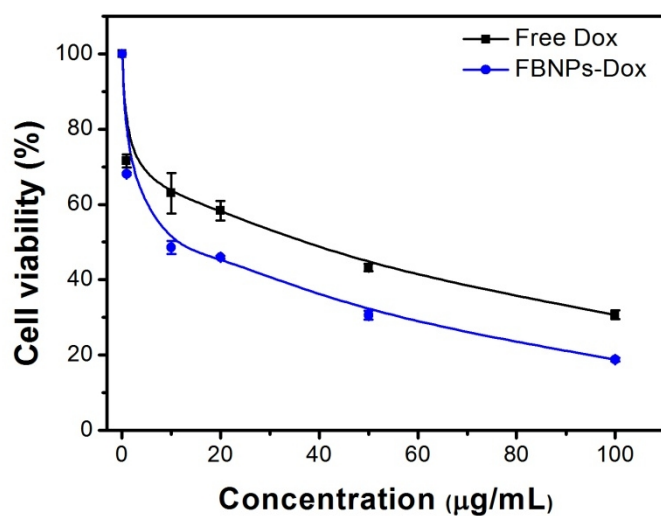

Figure S5. Cell viability of DOX resistant cell lines MCF-7R after treatment with pH-responsive Dox-loaded nanoparticles.

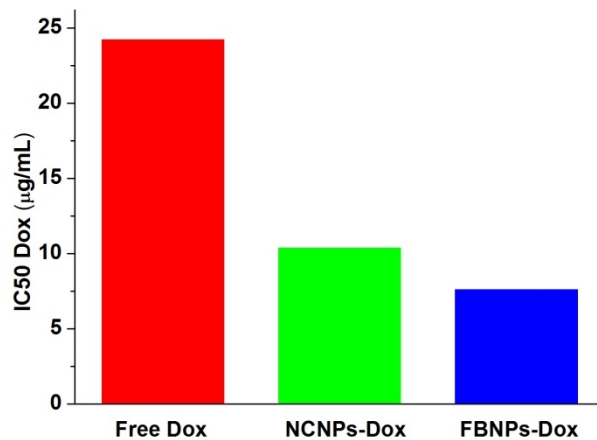

Figure S6. IC<sub>50</sub> of free DOX, NCNPs-Dox and FBNPs-Dox were calculated.

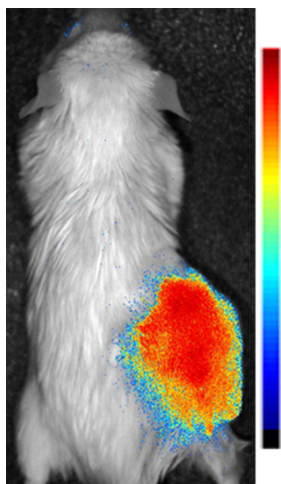

Figure S7. In vivo fluorescence image of FBNPs injected into mice tumor.
